# Supplementary material for: Mediational Occupational Risk Factors Pertaining to Work Ability According to Age, Gender and Professional Job Type
Source: MDPI journal article supplement (doi:10.3390/ijerph18030877), 2021-01-20
Supplement: s1 [file s1]

**Supplementary Table 1.** Spearman correlation coefficients between working conditions risk variables and overall WAI scores.

| <b>Working conditions risk variables</b> | <b>r</b> | <b>p-value</b> |
|------------------------------------------|----------|----------------|
| Current environmental risk               | -0.154   | 0.001          |
| Historic environmental risk              | -0.218   | 0.001          |
| Current ergonomic risk                   | -0.292   | 0.001          |
| Historic ergonomic risk                  | -0.340   | 0.001          |
| Psychosocial risk                        | -0.367   | 0.001          |
| Violence-discrimination                  | -0.286   | 0.001          |
| Work-family conflict                     | -0.456   | 0.001          |
